# Supplementary material for: Gut microbial composition in patients with atrial fibrillation: effects of diet and drugs
Source: Springer Nature journal article supplement (doi:10.1007/s00380-020-01669-y), 2020-07-18
Supplement: MOESM1 [file 18195046]

# Gut microbial composition in patients with atrial fibrillation: Effects of diet and drugs

## Heart and vessels

Tokiko Tabata<sup>1</sup>, Tomoya Yamashita<sup>1</sup>, Koji Hosomi<sup>2</sup>, Jonguk Park<sup>3</sup>, Tomohiro Hayashi<sup>1</sup>, Naofumi Yoshida<sup>1</sup>, Yoshihiro Saito<sup>1</sup>, Koji Fukuzawa<sup>1</sup>, Kana Konishi<sup>4</sup>, Haruka Murakami<sup>4</sup>, Hitoshi Kawashima<sup>3</sup>, Kenji Mizuguchi<sup>3, 5</sup>, Motohiko Miyachi<sup>4</sup>, Jun Kunisawa<sup>2</sup>, Ken-ichi Hirata<sup>1</sup>

<sup>1</sup>Division of Cardiovascular Medicine, Department of Internal Medicine, Kobe University Graduate School of Medicine, Kobe, Japan

<sup>2</sup>Laboratory of Vaccine Materials and Laboratory of Gut Environmental System, National Institutes of Biomedical Innovation, Health and Nutrition (NIBIOHN), Osaka, Japan

<sup>3</sup>Laboratory of Bioinformatics, National Institutes of Biomedical Innovation, Health and Nutrition (NIBIOHN), Osaka, Japan

<sup>4</sup>Department of Physical Activity Research, National Institutes of Biomedical Innovation, Health and Nutrition (NIBIOHN), Tokyo, Japan

<sup>5</sup>Institute for Protein Research, Osaka University, Osaka, Japan

Corresponding author:

Tomoya Yamashita, M.D., Ph.D.

Division of Cardiovascular Medicine, Department of Internal Medicine

Kobe University Graduate School of Medicine

7-5-1 Kusunoki-cho, Chuo-ku, Kobe 6500017, Japan

Phone: +81-78-382-5111, Fax: +81-78-382-5859

E-mail: [tomoya@med.kobe-u.ac.jp](mailto:tomoya@med.kobe-u.ac.jp)

| Phylum level           | Control (%)         | AF (%)              | p value | q value |
|------------------------|---------------------|---------------------|---------|---------|
| <i>Firmicutes</i>      | 41.06 ± 2.01        | 45.60 ± 2.74        | 0.188   | > 0.999 |
| <i>Verrucomicrobia</i> | 0.000 [0.000-0.043] | 0.000 [0.000-0.135] | 0.385   | > 0.999 |
| <i>Proteobacteria</i>  | 3.161 [1.434-8.882] | 2.598 [1.456-5.893] | 0.423   | 0.846   |
| <i>Bacteroidetes</i>   | 45.65 ± 1.91        | 44.82 ± 2.29        | 0.793   | > 0.999 |
| <i>Actinobacteria</i>  | 1.692 [0.726-3.718] | 1.988 [0.532-3.771] | 0.864   | > 0.999 |
| <i>Fusobacteria</i>    | 0.000 [0.000-0.658] | 0.000 [0.000-0.273] | 0.933   | 0.933   |

**Supplemental Table 1:** Gut microbial abundance of phylum level control subjects vs AF patients  
Values are expressed as mean±standard deviation for normally distributed variable, median and interquartile range for non-normally distributed variables.

| Genus level                          | Control (%)         | AF (%)              | p value | q value |
|--------------------------------------|---------------------|---------------------|---------|---------|
| <i>Enterobacter</i>                  | 0.052 [0.000-2.653] | 0.000 [0.000-0.010] | < 0.001 | 0.008   |
| <i>Butyricimonas</i>                 | 0.026 [0.000-0.140] | 0.165 [0.008-0.404] | 0.001   | 0.053   |
| <i>Dorea</i>                         | 0.175 [0.018-0.329] | 0.431 [0.104-0.644] | 0.002   | 0.043   |
| <i>Lachnoclostridium</i>             | 0.480 [0.305-0.950] | 0.900 [0.534-1.476] | 0.002   | 0.042   |
| <i>Lachnospiraceae_uncultured</i>    | 0.390 [0.215-0.735] | 0.737 [0.338-1.451] | 0.003   | 0.049   |
| <i>Parabacteroides</i>               | 1.121 [0.526-2.552] | 2.229 [1.376-3.853] | 0.005   | 0.060   |
| <i>Streptococcus</i>                 | 0.170 [0.023-0.872] | 0.634 [0.110-2.349] | 0.012   | 0.125   |
| <i>Odoribacter</i>                   | 0.121 [0.000-0.305] | 0.238 [0.094-0.527] | 0.012   | 0.111   |
| <i>Barnesiella</i>                   | 0.021 [0.000-0.208] | 0.278 [0.000-1.078] | 0.015   | 0.128   |
| <i>Flavonifractor</i>                | 0.041 [0.011-0.113] | 0.098 [0.021-0.179] | 0.019   | 0.146   |
| <i>Veillonella</i>                   | 0.026 [0.000-0.144] | 0.084 [0.018-0.413] | 0.022   | 0.149   |
| <i>Alistipes</i>                     | 0.360 [0.090-1.420] | 1.050 [0.200-3.010] | 0.024   | 0.150   |
| <i>Catenibacterium</i>               | 0.000 [0.000-0.000] | 0.000 [0.000-0.141] | 0.031   | 0.182   |
| <i>Paraprevotella</i>                | 0.000 [0.000-0.000] | 0.000 [0.000-0.665] | 0.033   | 0.181   |
| <i>Megamonas</i>                     | 0.000 [0.000-0.010] | 0.000 [0.000-0.261] | 0.070   | 0.354   |
| <i>Prevotellaceae_uncultured</i>     | 0.000 [0.000-0.000] | 0.000 [0.000-0.000] | 0.117   | 0.556   |
| <i>Sutterella</i>                    | 0.507 [0.000-1.551] | 0.956 [0.106-2.098] | 0.125   | 0.559   |
| <i>Ruminococcus 1</i>                | 0.016 [0.000-0.419] | 0.101 [0.000-1.511] | 0.125   | 0.529   |
| <i>Eubacterium ruminantium group</i> | 0.000 [0.000-0.000] | 0.000 [0.000-0.000] | 0.139   | 0.558   |
| <i>Dialister</i>                     | 0.000 [0.000-0.024] | 0.000 [0.000-0.079] | 0.151   | 0.545   |
| <i>Prevotellaceae NK3B31 group</i>   | 0.000 [0.000-0.000] | 0.000 [0.000-0.335] | 0.171   | 0.590   |
| <i>Prevotellaceae UCG-003</i>        | 0.000 [0.000-0.000] | 0.000 [0.000-0.000] | 0.174   | 0.573   |
| <i>Parasutterella</i>                | 0.052 [0.000-0.518] | 0.021 [0.000-0.190] | 0.180   | 0.569   |
| <i>Holdemanella</i>                  | 0.000 [0.000-0.328] | 0.000 [0.000-0.003] | 0.238   | 0.724   |
| <i>Eubacterium ventriosum group</i>  | 0.053 [0.000-0.203] | 0.089 [0.010-0.238] | 0.241   | 0.705   |
| <i>Clostridium sensu stricto 1</i>   | 0.000 [0.000-0.069] | 0.010 [0.000-0.231] | 0.253   | 0.713   |
| <i>Akkermansia</i>                   | 0.000 [0.000-0.043] | 0.000 [0.000-0.140] | 0.293   | 0.796   |
| <i>Eubacterium eligens group</i>     | 0.005 [0.000-0.137] | 0.059 [0.000-0.377] | 0.295   | 0.774   |
| <i>Lachnospiraceae NK4A136 group</i> | 0.145 [0.031-0.562] | 0.250 [0.028-0.612] | 0.298   | 0.755   |
| <i>Ruminococcus torques group</i>    | 0.811 [0.383-1.828] | 0.943 [0.540-2.225] | 0.319   | 0.782   |
| <i>Ruminococcaceae UCG-002</i>       | 0.042 [0.000-0.792] | 0.166 [0.000-1.507] | 0.326   | 0.774   |
| <i>Lachnospira</i>                   | 0.366 [0.018-1.111] | 0.662 [0.101-1.315] | 0.340   | 0.783   |
| <i>Ruminiclostridium 5</i>           | 0.219 [0.099-0.559] | 0.181 [0.088-0.506] | 0.348   | 0.777   |
| <i>Erysipelotrichaceae UCG-003</i>   | 0.000 [0.000-0.101] | 0.000 [0.000-0.126] | 0.365   | 0.792   |
| <i>Klebsiella</i>                    | 0.000 [0.000-0.100] | 0.010 [0.000-0.140] | 0.375   | 0.792   |
| <i>Lactobacillus</i>                 | 0.000 [0.000-0.021] | 0.000 [0.000-0.133] | 0.391   | 0.803   |
| <i>Phascolarctobacterium</i>         | 0.690 [0.201-1.255] | 0.865 [0.053-1.822] | 0.448   | 0.896   |
| <i>Lachnospiraceae UCG-004</i>       | 0.136 [0.051-0.263] | 0.084 [0.041-0.249] | 0.490   | 0.955   |
| <i>Ruminiclostridium 9</i>           | 0.052 [0.021-0.182] | 0.051 [0.022-0.117] | 0.512   | 0.972   |
| <i>Ruminococcaceae_uncultured</i>    | 0.270 [0.105-0.707] | 0.409 [0.158-0.865] | 0.516   | 0.956   |
| <i>Coprococcus 1</i>                 | 0.095 [0.000-0.172] | 0.092 [0.000-0.282] | 0.528   | 0.955   |
| <i>Coprococcus 2</i>                 | 0.000 [0.000-0.000] | 0.000 [0.000-0.000] | 0.542   | 0.959   |
| <i>Christensenellaceae R-7 group</i> | 0.011 [0.000-0.183] | 0.037 [0.000-0.418] | 0.591   | > 0.999 |

|                                                        |                     |                     |         |         |
|--------------------------------------------------------|---------------------|---------------------|---------|---------|
| <i>Ruminococcaceae</i> UCG-003                         | 0.026 [0.000-0.230] | 0.073 [0.000-0.291] | 0.597   | > 0.999 |
| <i>Fusicatenibacter</i>                                | 0.386 [0.115-0.940] | 0.438 [0.101-1.291] | 0.601   | 0.992   |
| <i>Ruminococcaceae</i> NK4A214 group                   | 0.000 [0.000-0.223] | 0.010 [0.000-0.164] | 0.613   | 0.991   |
| <i>Prevotella</i> 2                                    | 0.000 [0.000-0.010] | 0.000 [0.000-0.003] | 0.629   | 0.995   |
| <i>Eubacterium hallii</i> group                        | 0.815 [0.313-1.353] | 0.713 [0.411-1.192] | 0.634   | 0.983   |
| <i>Lachnospiraceae</i> UCG-008                         | 0.180 [0.050-0.414] | 0.177 [0.082-0.342] | 0.637   | 0.967   |
| <i>Bifidobacterium</i>                                 | 1.265 [0.304-2.972] | 1.030 [0.010-2.955] | 0.661   | 0.985   |
| <i>Eubacterium coprostanoligenes</i> group             | 0.214 [0.000-0.750] | 0.228 [0.000-0.760] | 0.662   | 0.967   |
| <i>Collinsella</i>                                     | 0.324 [0.057-0.755] | 0.380 [0.068-0.868] | 0.667   | 0.957   |
| <i>Roseburia</i>                                       | 2.378 [0.718-4.365] | 2.179 [1.323-3.440] | 0.692   | 0.974   |
| <i>Blautia</i>                                         | 2.735 [1.478-5.270] | 2.835 [1.183-5.570] | 0.715   | 0.987   |
| <i>Faecalibacterium</i>                                | 7.376 [1.676-12.81] | 5.269 [1.759-12.28] | 0.715   | 0.970   |
| <i>Anaerostipes</i>                                    | 0.439 [0.198-1.368] | 0.536 [0.130-1.140] | 0.716   | 0.955   |
| <i>Ruminococcaceae</i> UCG-005                         | 0.016 [0.000-0.252] | 0.036 [0.000-0.280] | 0.722   | 0.946   |
| <i>Bacteroidales</i> S24-7 group_ uncultured bacterium | 0.020 [0.000-0.198] | 0.016 [0.000-0.037] | 0.728   | 0.938   |
| <i>Bacteroides</i>                                     | 29.30 [14.84-49.23] | 30.47 [18.83-38.08] | 0.753   | 0.954   |
| <i>Anaerotruncus</i>                                   | 0.064 [0.000-0.179] | 0.052 [0.000-0.254] | 0.768   | 0.956   |
| <i>Butyricicoccus</i>                                  | 0.426 [0.134-0.709] | 0.372 [0.174-0.599] | 0.781   | 0.957   |
| <i>Ruminococcaceae</i> UCG-013                         | 0.201 [0.000-0.416] | 0.162 [0.011-0.480] | 0.798   | 0.962   |
| <i>Ruminococcus</i> 2                                  | 0.000 [0.000-0.823] | 0.000 [0.000-0.888] | 0.798   | 0.948   |
| <i>Ruminococcaceae</i> UCG-014                         | 0.000 [0.000-0.034] | 0.000 [0.000-0.039] | 0.839   | 0.981   |
| <i>Peptoclostridium</i>                                | 0.031 [0.010-0.094] | 0.026 [0.008-0.119] | 0.881   | > 0.999 |
| <i>Prevotella</i> 9                                    | 0.000 [0.000-3.050] | 0.000 [0.000-0.035] | 0.895   | > 0.999 |
| <i>Ruminiclostridium</i> 6                             | 0.000 [0.000-0.042] | 0.000 [0.000-0.026] | 0.895   | > 0.999 |
| <i>Megasphaera</i>                                     | 0.000 [0.000-0.067] | 0.000 [0.000-0.172] | 0.913   | > 0.999 |
| <i>Alloprevotella</i>                                  | 0.000 [0.000-0.000] | 0.000 [0.000-0.000] | 0.953   | > 0.999 |
| <i>Subdoligranulum</i>                                 | 0.980 [0.104-2.385] | 0.541 [0.063-2.861] | 0.962   | > 0.999 |
| <i>Acidaminococcus</i>                                 | 0.000 [0.000-0.096] | 0.000 [0.000-0.118] | 0.970   | > 0.999 |
| <i>Bilophila</i>                                       | 0.076 [0.008-0.272] | 0.082 [0.001-0.218] | 0.974   | > 0.999 |
| <i>Fusobacterium</i>                                   | 0.000 [0.000-0.672] | 0.000 [0.000-0.296] | 0.977   | > 0.999 |
| <i>Escherichia-Shigella</i>                            | 0.068 [0.011-0.549] | 0.071 [0.018-0.501] | 0.986   | 0.999   |
| <i>Succinivibrio</i>                                   | 0.000 [0.000-0.000] | 0.000 [0.000-0.000] | > 0.999 | > 0.999 |

**Supplemental Table 2:** Gut microbial abundance of genus level control subjects vs AF patients. Values are expressed as median and interquartile range for non-normally distributed variables.

|                                  | Control Subjects<br>(n=66) | AF patients<br>(n=34) | p value |
|----------------------------------|----------------------------|-----------------------|---------|
| <b>n-3 PUFAs</b>                 |                            |                       |         |
| α Linolenic acid/1000 kcal       | 860.6 ± 32.4               | 935.2 ± 40.7          | 0.17    |
| Stearidonic acid/1000 kcal       | 39.3 (27.7 - 69.5)         | 60.8 (31.8 - 79.2)    | 0.13    |
| Eicosatetraenoic acid/1000 kcal  | 14.8 (10.2 - 25.3)         | 22.9 (10.7 - 29.2)    | 0.17    |
| Eicosapentaenoic acid/1000 kcal  | 144.5 (99.9 - 260.7)       | 229.7 (108.0 - 291.4) | 0.17    |
| Docosapentaenoic acid/1000 kcal  | 44.1 (33.4 - 74.6)         | 64.3 (33.7 - 80.6)    | 0.20    |
| Docosahexaenoic acid/1000 kcal   | 251.5 (178.6 - 413.9)      | 356.0 (190.1 - 463.6) | 0.19    |
| <b>n-6 PUFAs</b>                 |                            |                       |         |
| Linolenic acid/1000 kcal         | 5546 ± 174                 | 5682 ± 191            | 0.40    |
| γ Linolenic acid/1000 kcal       | 3.4 (2.2 - 5.1)            | 4.2 (2.6 - 6.7)       | 0.08    |
| Eicosadienoic acid/1000 kcal     | 25.3 ± 0.9                 | 29.4 ± 1.4            | <0.05   |
| Dihomo-γ Linoleic acid/1000 kcal | 16.9 ± 0.6                 | 18.5 ± 1.0            | 0.13    |
| Arachidonic acid/1000 kcal       | 95.7 (75.8 - 116.9)        | 99.2 (77.8 - 116.1)   | 0.50    |

**Supplemental Table 3:** Dietary composition about polyunsaturated fatty acids control subjects vs AF patients. Values are expressed as mean±standard deviation for normally distributed variable, median and interquartile range for non-normally distributed variables.
